# Supplementary material for: Effects of different physical activities on brain-derived neurotrophic factor: A systematic review and bayesian network meta-analysis
Source: Frontiers journal article supplement (doi:10.3389/fnagi.2022.981002), 2022-08-26
Supplement: Table_1.XLS [file Table_1.XLS]

## Sheet: Sheet1
	人数	基线Mean	基线SD	终点Mean	终点SD	R	差值Mean	差值SD
Vaughan CT	25	4.5	2.2	5.2	1.8	0.5	0.7	2.02978
Vaughan 对照	23	5.6	1.8	4.7	2.4	0.5	-0.9	2.16333
Wens AT+RT	15	11.092	3.89235	12.02	3.64835	0.5	0.928	3.77627
Wens 对照	7	13.877	3.12992	12.338	2.59019	0.5	-1.539	2.898
Deus RT	81	11.66	5.2	19.6	7.23	0.5	7.94	6.45886
Deus 对照	76	14.4	4.99	10.84	5.94	0.5	-3.56	5.52658
Imboden AT	22	23	9.5	30.3	16.1	0.5	7.3	14.0182
Imboden 对照	20	21.4	8.2	24.1	13.4	0.5	2.7	11.7013
Arrieta CT	43	34.2	15	33.5	13.2	0.5	-0.7	14.1859
Arrieta 对照	45	33.6	14.2	32.8	15.7	0.5	-0.8	15.0063
Goldfield AT	69	24.6	14.12	26.4	14.42	0.5	1.8	14.2724
Goldfield RT	70	29.7	14.22	27.7	14.59	0.5	-2	14.4086
Goldfield AT+RT	74	27.9	14.62	26.2	14.97	0.5	-1.7	14.7981
Goldfield 对照	69	25.8	14.12	28.1	14.85	0.5	2.3	14.4988
Nascimento CT	24	2.44	0.98	3.07	1.06	0.5	0.63	1.02235
Nascimento 对照	21	2.55	0.94	2.4	0.56	0.5	-0.15	0.819024
Ledreux AT	29	24.5	7.81	24.8	7.54	0.5	0.3	7.67856
Ledreux 对照	39	24	7.62	23	9.24	0.5	-1	8.54595
Ghafori CT	20	0.54247	0.00508	0.6428	0.02141	0.5	0.10033	0.0193761
Ghafori 对照	20	0.53831	0.00684	0.53875	0.00693	0.5	0.00044	0.00688544
Heisz HIIT	34	33.5	7.9	31.3	7.6	0.5	-2.2	7.75435
Heisz 对照	32	31.9	8.3	33.2	7.3	0.5	1.3	7.84793
Kohanpour AT	10	0.11025	0.02861	0.19284	0.05951	0.5	0.08259	0.0515499
Kohanpour 对照	10	0.11075	0.02607	0.11109	0.02419	0.5	0.00034	0.0251827
Zimmer HIIT	27	20.965	10.606	24.663	13.019	0.5	3.698	11.9959
Zimmer 对照	30	19.286	11.234	20.858	10.166	0.5	1.572	10.7399
Wagner AT	17	12.4	5.8	16.7	7.7	0.5	4.3	6.94766
Wagner 对照	17	8.1	3.6	12.3	3.9	0.5	4.2	3.75899
Cho AT	8	24.8	4.1	29.9	5.3	0.5	5.1	4.81352
Cho 对照	8	24.8	4.9	25.1	4.9	0.5	0.3	4.9
Kerling CT	22	0.4152	0.3628	0.4725	0.5261	0.5	0.0573	0.466408
Kerling 对照	20	0.4548	0.3543	0.4329	0.3357	0.5	-0.0219	0.345376
Erickson AT	60	21.32	9.32	23.77	8.04	0.5	2.45	8.7505
Erickson 对照	60	23.41	9.67	24.04	10.83	0.5	0.63	10.2991
Jeon AT	10	25.24	34.17	30.09	48	0.5	4.85	42.7952
Jeon 对照	10	23.96	20.93	24.5	22.04	0.5	0.54	21.5065
Ozkul CT	18	0.69623	0.770743	0.89115	0.79353	0.5	0.19492	0.782385
Ozkul 对照	18	0.86459	1.45207	0.87184	1.66663	0.5	0.00725	1.57038
Abbaspoor CT	8	1.96	0.65	1.79	0.55	0.5	-0.17	0.606218
Abbaspoor 对照	8	1.94	0.48	1.99	0.6	0.5	0.05	0.549909
Krogh AT	41	25.347	6.224	26.0055	7.184	0.5	0.6585	6.75535
Krogh 对照	38	25.488	7.165	25.0438	7.428	0.5	-0.4442	7.30005
Elham CT	13	10.6789	2.26017	11.5501	2.6196	0.5	0.87129	2.45966
Elham 对照	12	11.3775	3.86061	9.66435	3.16166	0.5	-1.71314	3.56293
Byun AT+RT	13	19.07	1.51	20.14	1.31	0.5	1.07	1.4206
Byun 对照	11	18.99	1.69	18.8	2.34	0.5	-0.19	2.09215
Seifert AT	7	2.5	2.4	5.5	2.3	0.5	3	2.3516
Seifert 对照	5	1.2	0.5	2.2	2.1	0.5	1	1.9
Szymura AT	16	21.19	8.36	30.37	6.33	0.5	9.18	7.55246
Szymura 控制	13	30.08	8.04	25.78	11.72	0.5	-4.3	10.3813
Schulz AT	15	4.353	3.217	5.93	5.178	0.5	1.577	4.52804
Schulz 对照	13	5.081	2.312	4.2	2.073	0.5	-0.881	2.20225
Liu AT	31	19.2536	7.00884	21.2008	7.40638	0.5	1.94725	7.21583
Liu RT	30	23.4583	5.41826	25.4138	7.50438	0.5	1.95546	6.70914
Hsu HIIT	10	6.06	3.15	7.91	2.87	0.5	1.85	3.01975
Hsu AT	13	7.3	2.04	5.88	1.92	0.5	-1.42	1.98273
Ruiz RT	20	14.02	4.87	12	3.32	0.5	-2.02	4.3094
Ruiz 对照	20	14.5	4.63	13.53	3.32	0.5	-0.97	4.13373
Kim CT	33	6.37	1.44	7.07	1.01	0.5	0.7	1.28035
Kim 对照	32	6.1	1.47	6.36	1.31	0.5	0.26	1.39689
Fragala RT	13	30.8	15.3	28.6	15	0.5	-2.2	15.1522
Fragala 对照	12	28.3	12.7	27.8	11.2	0.5	-0.5	12.0204
Maass AT	21	17.6359	5.7545	16.9178	6.9586	0.5	-0.7181	6.44152
Maass 对照	19	18.4681	6.6162	18.4712	7.2829	0.5	0.0031	6.97349
Hvid RT	22	28.53	13	28.39	12.68	0.5	-0.14	12.843
Hvid 对照	25	24.08	8.87	27.15	12.56	0.5	3.07	11.1814
Matura AT	29	3.718	1.243	3.807	1.092	0.5	0.089	1.1748
Matura 对照	24	3.903	1.412	3.648	1.04	0.5	-0.255	1.26762
El-Tamawy AT	15	19.18	3.71	23.83	5.18	0.5	4.65	4.62371
El-Tamawy 对照	15	20.48	3.4	20.66	2.77	0.5	0.18	3.13287
Frazzitta CT	14	21.64	3.4	24.77	6.4	0.5	3.13	5.54617
Frazzitta 对照	10	22.87	4	22.58	4.3	0.5	-0.29	4.15812
de Lima AT	12	1.12199	0.12048	1.85241	0.26355	0.5	0.73042	0.22852
de Lima HIIT	13	1.20482	0.15813	2.01054	0.23344	0.5	0.80572	0.206362
Rezola-Pardo CT	32	25.8782	11.6791	26.9364	7.9806	0.5	1.0582	10.3385
Rezola-Pardo 对照	35	28.5377	10.4139	28.7202	11.3869	0.5	0.1825	10.9329
Briken AT	32	5.11007	0.267	5.74762	0.25486	0.5	0.63755	0.261142
Briken 对照	10	5.51051	0.54613	5.74762	0.53399	0.5	0.23711	0.540162
Damirchi AT	11	1.11291	0.27686	1.03385	0.31384	0.5	-0.07906	0.297081
Damirchi 对照	10	1.0893	0.30018	1.10154	0.27077	0.5	0.01224	0.286609
Yin CT	12	5.17	2.29	14.46	4.01	0.5	9.29	3.48444
Yin 对照	14	5.78	3.5	5.11	4.7	0.5	-0.67	4.22966
Yin CT	15	7.61	3.56	14.45	2.71	0.5	6.84	3.22026
Yin 对照	15	3.73	1.62	4.54	3.75	0.5	0.81	3.25759
	2035
